# Supplementary material for: Adverse pregnancy outcomes in gestational diabetes mellitus: a systematic review and meta-analysis protocol
Source: HighWire-hosted journal article supplement (doi:10.1136/bmjopen-2021-058625), 2024-05-01
Supplement: bmjopen-2021-058625supp002_data_supplement.pdf [file bmjopen-2021-058625supp002_data_supplement.pdf]

Table #: PubMed Search strategy, modified as needed for other electronic databases

| Population: |                                                                                            |                                                                                                                                                                                                                                                                                                                                                                                                                                       |
|-------------|--------------------------------------------------------------------------------------------|---------------------------------------------------------------------------------------------------------------------------------------------------------------------------------------------------------------------------------------------------------------------------------------------------------------------------------------------------------------------------------------------------------------------------------------|
| #1          | MeSH terms:                                                                                | Diabetes, Gestational                                                                                                                                                                                                                                                                                                                                                                                                                 |
| #2          | Text Word:                                                                                 | Gestational Diabetes OR GDM OR Gestational Diabetes Mellitus OR Pregnancy-induced diabetes OR Diabetes in Pregnancy OR Hyperglycaemia in Pregnancy OR Hyperglycemia in Pregnancy                                                                                                                                                                                                                                                      |
| #3          | #1 OR #2                                                                                   |                                                                                                                                                                                                                                                                                                                                                                                                                                       |
| Outcomes    |                                                                                            |                                                                                                                                                                                                                                                                                                                                                                                                                                       |
|             |                                                                                            |                                                                                                                                                                                                                                                                                                                                                                                                                                       |
| #4          | Text Word:                                                                                 | Fetal outcomes OR Foetal outcomes OR Macrosomia OR Large for Gestational Age OR Perinatal Mortality OR Shoulder Dystocia OR Congenital Malformation OR Miscarriage OR Spontaneous Abortion OR Neonatal Hypoglycaemia OR Neonatal Hypoglycemia OR Hyperbilirubinaemia OR Hyperbilirubinemia OR Birth Asphyxia OR Admission to the Neonatal Intensive Care Unit OR Overweight OR Obesity OR Offspring OR Child OR Childhood OR Children |
| #5          | #3 AND #4                                                                                  |                                                                                                                                                                                                                                                                                                                                                                                                                                       |
| #6          | #5 NOT (review OR metaanalysis OR systematic review OR meta-analysis OR literature review) |                                                                                                                                                                                                                                                                                                                                                                                                                                       |

Filters

- 1. 2010-2021
- 2. Humans

Table #: Cochrane and other databases Search strategy

| Population: |                         |                                                                                                                                                                                                                                                                                                                                                                                                                                                                                                                                                            |
|-------------|-------------------------|------------------------------------------------------------------------------------------------------------------------------------------------------------------------------------------------------------------------------------------------------------------------------------------------------------------------------------------------------------------------------------------------------------------------------------------------------------------------------------------------------------------------------------------------------------|
| #1          | Key Word:               | Gestational Diabetes OR GDM OR Gestational Diabetes Mellitus OR Pregnancy-induced diabetes OR Diabetes in Pregnancy OR Hyperglycaemia in Pregnancy OR Hyperglycemia in Pregnancy                                                                                                                                                                                                                                                                                                                                                                           |
| #4          | #1 OR #2 OR #3          |                                                                                                                                                                                                                                                                                                                                                                                                                                                                                                                                                            |
| #5          | Pregnancy               |                                                                                                                                                                                                                                                                                                                                                                                                                                                                                                                                                            |
| Outcomes    |                         |                                                                                                                                                                                                                                                                                                                                                                                                                                                                                                                                                            |
|             |                         |                                                                                                                                                                                                                                                                                                                                                                                                                                                                                                                                                            |
| #6          | Key Word:               | Fetal Outcomes OR Foetal Outcomes OR Macrosomia OR Large for Gestational Age OR Perinatal Mortality OR Shoulder Dystocia OR Congenital Malformation OR Miscarriage OR Spontaneous Abortion OR Neonatal Hypoglycaemia OR Neonatal Hypoglycemia OR Hyperbilirubinaemia OR Hyperbilirubinemia OR Birth Asphyxia OR Admission to the Neonatal Intensive Care Unit OR Overweight OR Obesity OR Long Term Outcomes in Offsprings OR co-ordinated care OR coordinated integrated care OR co-ordinated integrated care OR multicare OR multiservice OR multiclinic |
| #10         | #4 AND #5 AND #8 AND #9 |                                                                                                                                                                                                                                                                                                                                                                                                                                                                                                                                                            |

Table #: Scopus Search strategy

|             |           |                                                                                                                                                                                                                                |
|-------------|-----------|--------------------------------------------------------------------------------------------------------------------------------------------------------------------------------------------------------------------------------|
| Population: |           |                                                                                                                                                                                                                                |
| #1          | Key Word: | Gestational Diabetes OR GDM OR Gestational Diabetes Mellitus OR Pregnancy-induced diabetes OR Diabetes in Pregnancy OR Hyperglycaemia in Pregnancy OR Hyperglycemia in Pregnancy                                               |
|             |           |                                                                                                                                                                                                                                |
|             |           |                                                                                                                                                                                                                                |
| Outcomes:   |           |                                                                                                                                                                                                                                |
| #2          | Key Word: | Macrosomia OR Mortality OR Shoulder Dystocia OR Congenital OR Malformation OR Miscarriage OR Abortion OR Hypoglycaemia OR Hypoglycemia OR Hyperbilirubinaemia OR Hyperbilirubinemia OR Birth Asphyxia OR Overweight OR Obesity |
| #3          | #1 AND #2 |                                                                                                                                                                                                                                |
